# Supplementary material for: The Rice R2R3-MYB Transcription Factor OsMYB55 Is Involved in the Tolerance to High Temperature and Modulates Amino Acid Metabolism
Source: PubMed Central journal article supplement (PMC3522645; doi:10.1371/journal.pone.0052030), 2012-12-14
Supplement: pone.0052030.s003.pdf [file pone.0052030.s003.pdf]

**Table S1: Significantly enriched upregulated biological processes in the wild type and Myb transgenic plants**

| GO Term    | Onto | Description                                  | wt | Myb |
|------------|------|----------------------------------------------|----|-----|
| GO:0006457 | P    | protein folding                              |    |     |
| GO:0050896 | P    | response to stimulus                         |    |     |
| GO:0006950 | P    | response to stress                           |    |     |
| GO:0009266 | P    | response to temperature stimulus             |    |     |
| GO:0010035 | P    | response to inorganic substance              |    |     |
| GO:0009644 | P    | response to high light intensity             |    |     |
| GO:0009642 | P    | response to light intensity                  |    |     |
| GO:0034641 | P    | cellular nitrogen compound metabolic process |    |     |
| GO:0009408 | P    | response to heat                             |    |     |
| GO:0008380 | P    | RNA splicing                                 |    |     |
| GO:0009628 | P    | response to abiotic stimulus                 |    |     |
| GO:0042542 | P    | response to hydrogen peroxide                |    |     |
| GO:0000041 | P    | transition metal ion transport               |    |     |
| GO:0033036 | P    | macromolecule localization                   |    |     |
| GO:0045184 | P    | establishment of protein localization        |    |     |
| GO:0015031 | P    | protein transport                            |    |     |
| GO:0008104 | P    | protein localization                         |    |     |
| GO:0065009 | P    | regulation of molecular function             |    |     |

during heat treatment

| wt       |                     | Myb      |                     |
|----------|---------------------|----------|---------------------|
| FDR      | Num                 | FDR      | Num                 |
| 1.20E-15 | <a href="#">42</a>  | 8.90E-15 | <a href="#">42</a>  |
| 1.10E-06 | <a href="#">136</a> | 3.00E-06 | <a href="#">140</a> |
| 7.10E-06 | <a href="#">90</a>  | 2.20E-05 | <a href="#">92</a>  |
| 1.30E-05 | <a href="#">22</a>  | 2.90E-05 | <a href="#">22</a>  |
| 5.90E-05 | <a href="#">15</a>  | 2.30E-05 | <a href="#">16</a>  |
| 0.00012  | <a href="#">8</a>   | 0.00019  | <a href="#">8</a>   |
| 0.0011   | <a href="#">9</a>   | 0.0016   | <a href="#">9</a>   |
| 0.0013   | <a href="#">49</a>  | 0.00069  | <a href="#">52</a>  |
| 0.002    | <a href="#">10</a>  | 0.0033   | <a href="#">10</a>  |
| 0.0068   | <a href="#">11</a>  | 0.0098   | <a href="#">11</a>  |
| 0.013    | <a href="#">40</a>  | 0.0051   | <a href="#">43</a>  |
| 0.028    | <a href="#">7</a>   | 0.03     | <a href="#">7</a>   |
| 0.028    | <a href="#">10</a>  | ---      | ---                 |
| 0.037    | <a href="#">32</a>  | 0.0054   | <a href="#">36</a>  |
| ---      | ---                 | 0.018    | <a href="#">33</a>  |
| ---      | ---                 | 0.018    | <a href="#">33</a>  |
| ---      | ---                 | 0.028    | <a href="#">33</a>  |
| ---      | ---                 | 0.04     | <a href="#">14</a>  |
